# Supplementary material for: Lightweight and flexible MXene/CNF/silver composite membranes with a brick-like structure and high-performance electromagnetic-interference shielding
Source: PubMed Central journal article supplement — RSC Adv. 2019 Sep 19;9(51):29636–44. doi: 10.1039/c9ra06399d (PMC9071901; doi:10.1039/c9ra06399d), 2019-09-19
Supplement: RA-009-C9RA06399D-s001.pdf [file RA-009-C9RA06399D-s001.pdf]

*Supplemental Information*

**Lightweight and Flexible MXene/CNFs/Silver Composite  
Membranes with Brick-like Structure and High-  
Performance Electromagnetic-Interference Shielding**

Wei Xin,<sup>a</sup> Guo-Qiang Xi,<sup>a</sup> Wen-Tao Cao,<sup>a</sup> Chang Ma,<sup>a</sup> Tong Liu,<sup>a</sup> Ming-Guo Ma,<sup>a\*</sup>  
Jing Bian<sup>a</sup>

<sup>a</sup>Engineering Research Center of Forestry Biomass Materials and Bioenergy, Beijing  
Key Laboratory of Lignocellulosic Chemistry, College of Materials Science and  
Technology, Beijing Forestry University, Beijing 100083, PR China.

---

\*Corresponding author. Tel.: +0086-10-62337250, Fax.: +0086-10-62336903.

E-mail address: mg\_ma@bjfu.edu.cn (M.-G. Ma)

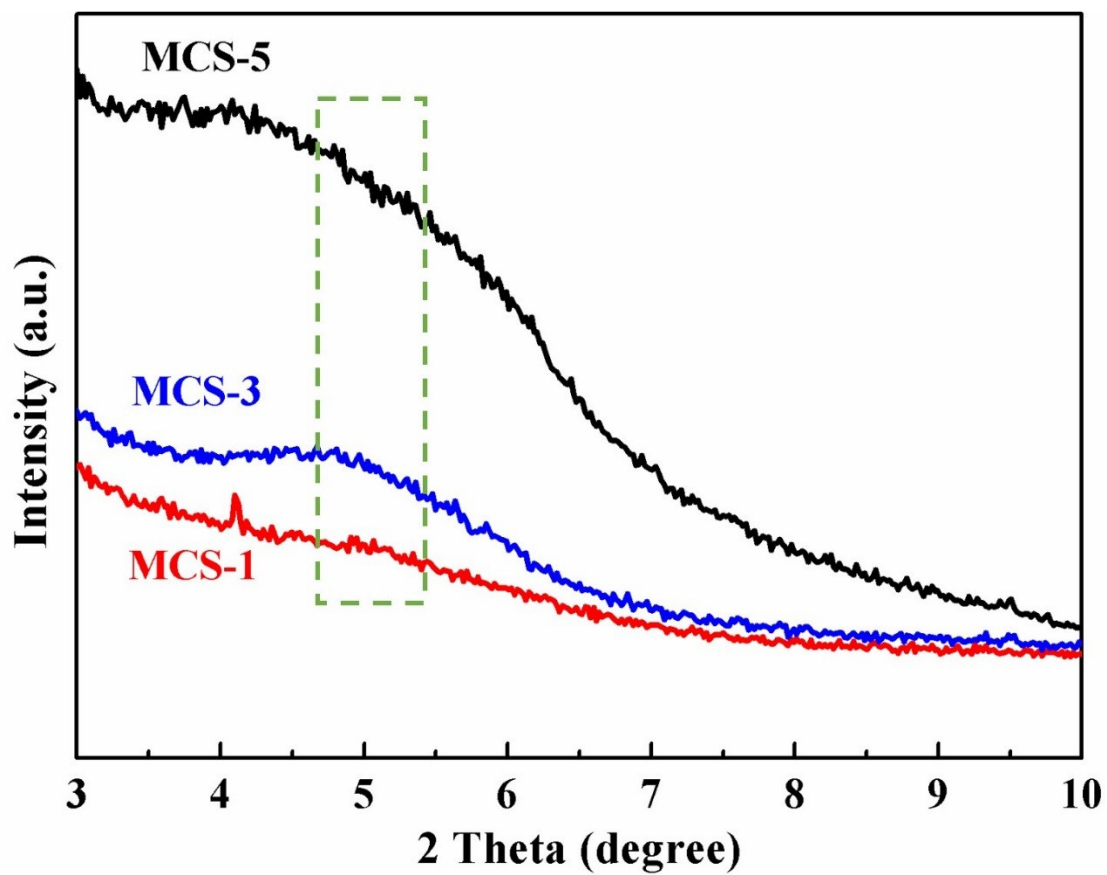

Fig. S1. XRD patterns of MCS-1, MCS-3, and MCS-5.

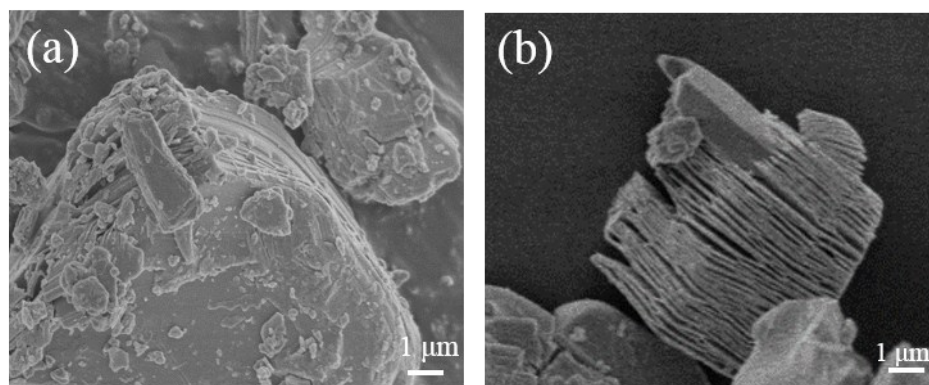

Fig. S2. SEM images of (a) the MAX ( $\text{Ti}_3\text{AlC}_2$ ) and (b) the MXene ( $\text{m-Ti}_3\text{C}_2\text{T}_x$ ).

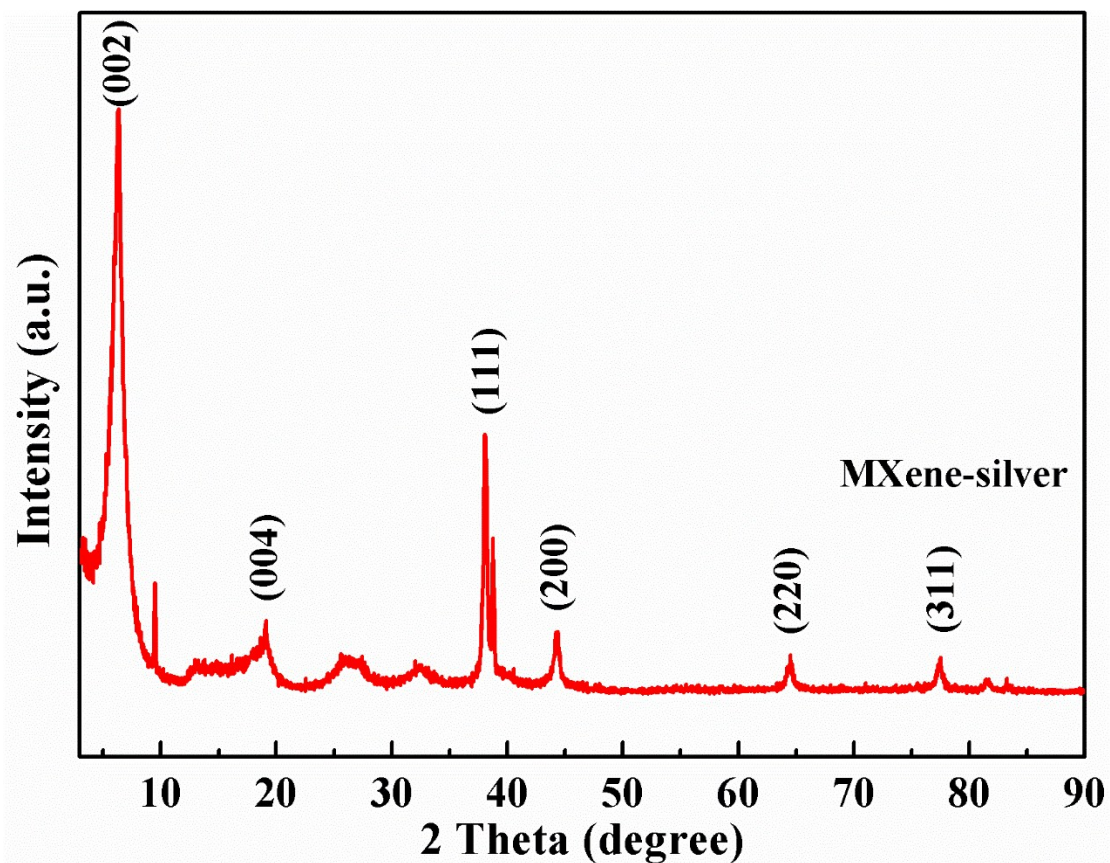

Fig. S3. XRD pattern of MXene/silver composite membranes.

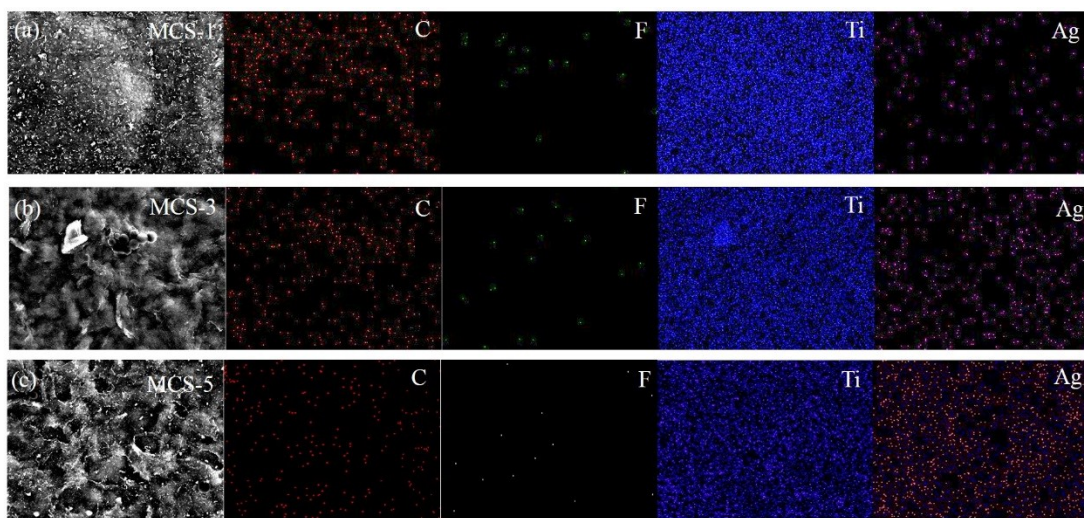

Fig. S4. SEM images of (a) MCS-1, (b) MCS-3, (c) MCS-5, and elemental mapping images of C, F, Ti, and Ag.

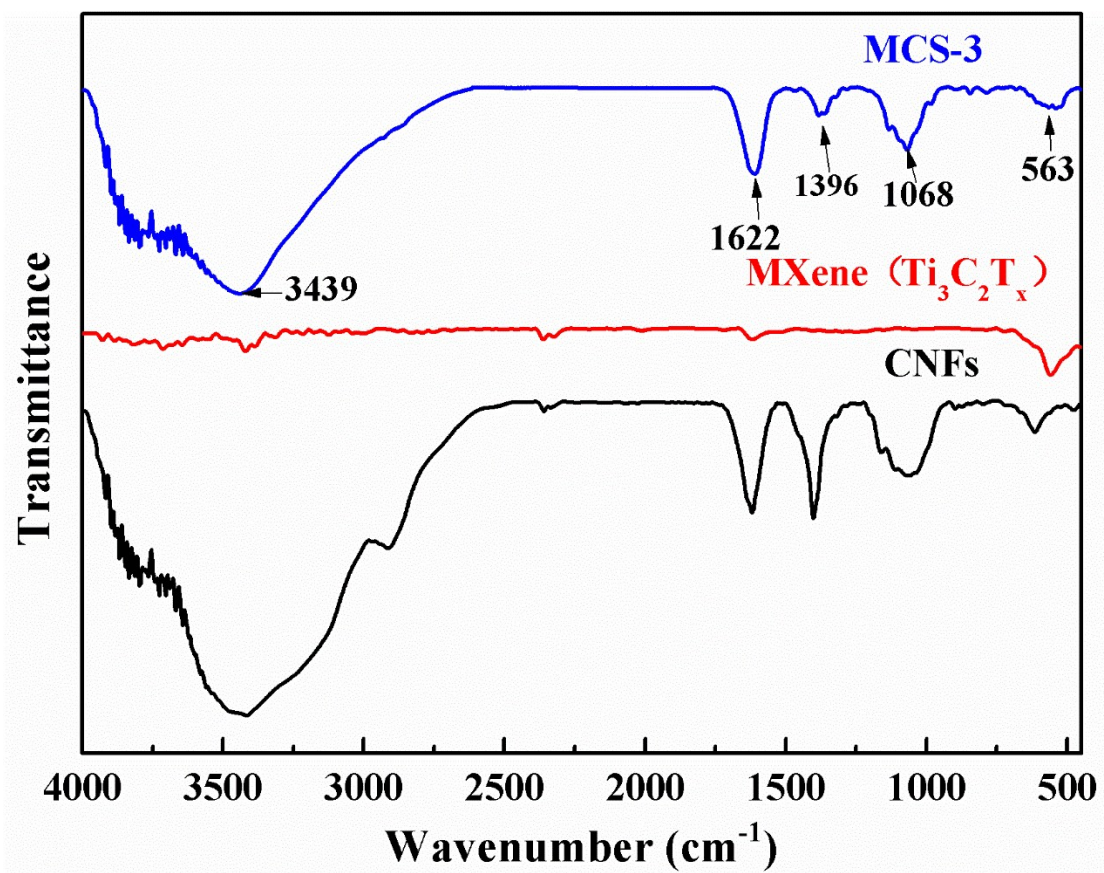

**Fig. S5.** FTIR spectra of the pure CNFs, pure MXene ( $\text{Ti}_3\text{C}_2\text{T}_x$ ), and MCS-3 composite membranes.

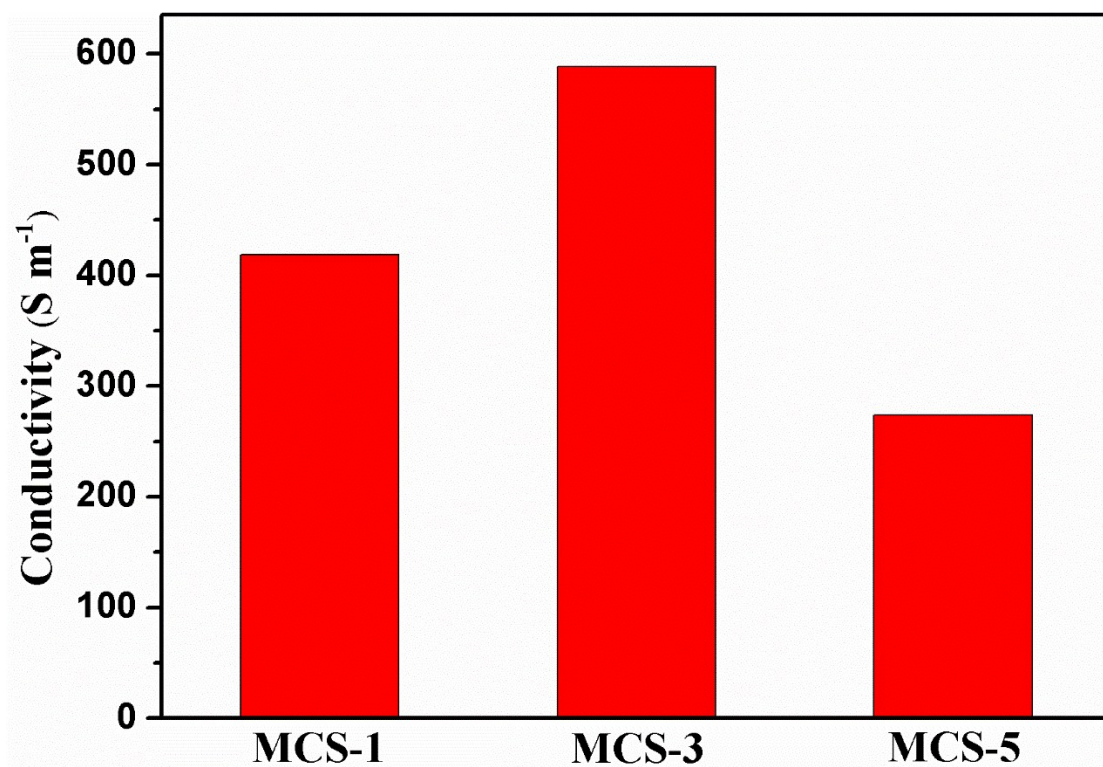

**Fig. S6.** The electrical conductivity of MCS-1, MCS-3, and MCS-5 composite membranes.

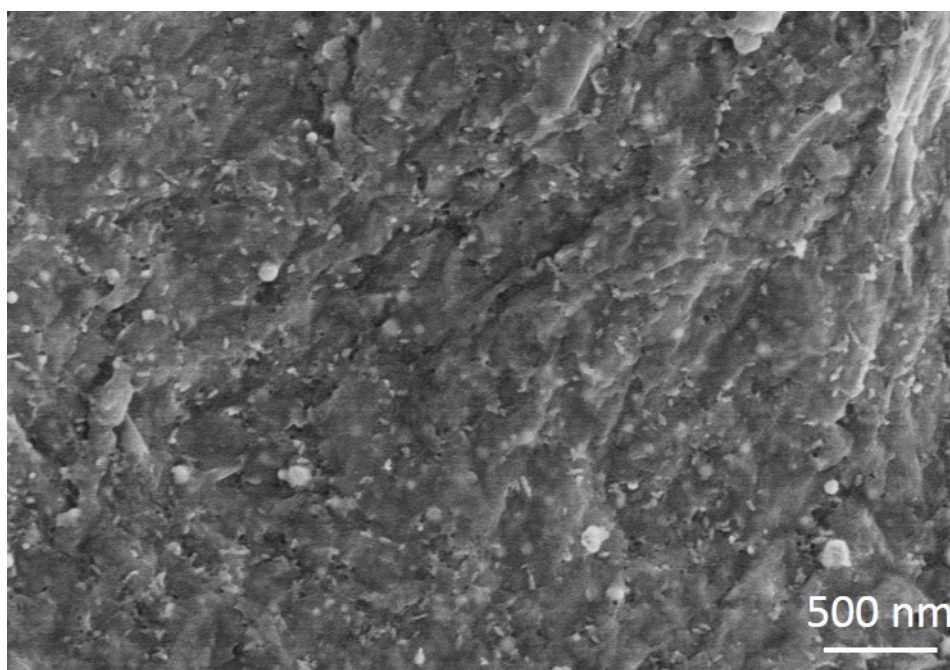

**Fig. S7.** SEM image of the MCS-5 composite membranes.

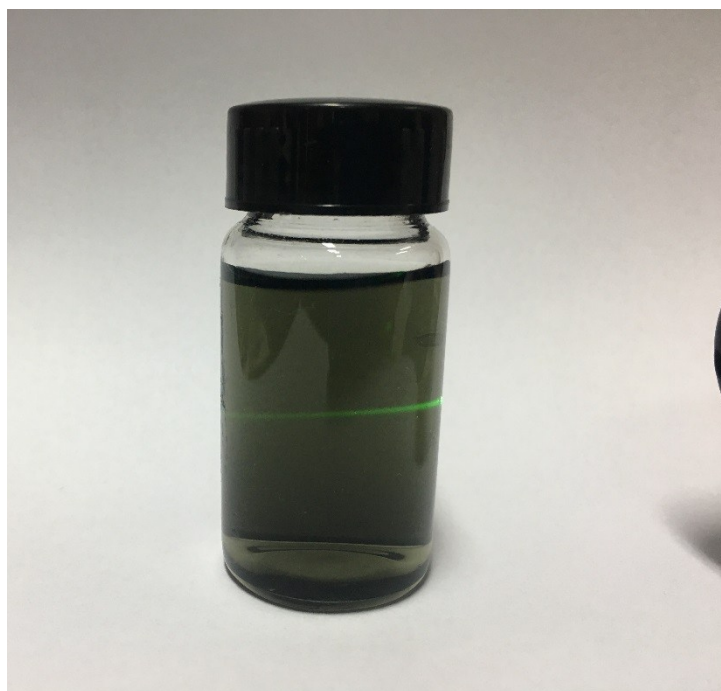

**Fig. S8.** Digital image of MCS-3 suspension produced the Tyndall effect.

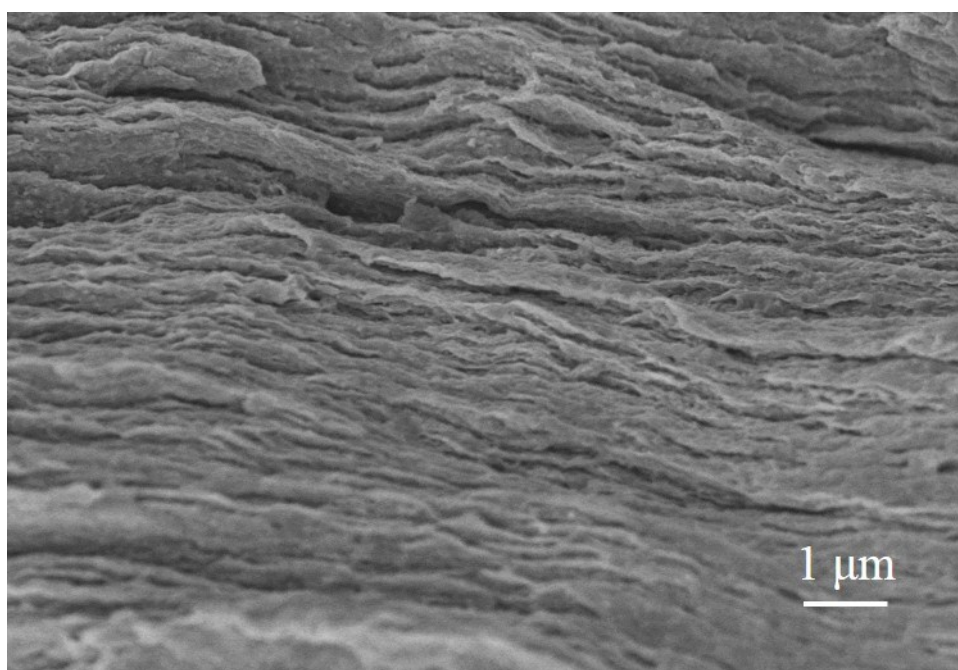

**Fig. S9.** SEM micrograph of the fracture surface of the MCS-5 composite membranes.

**Table S1.** Comparison of the EMI shielding performance of the MXene/CNFs/silver (MCS) composite membranes and other materials.

| <i>Sample</i> | <i>Symbols</i>                                                                      | <i>Materials</i>                              | <i>SE</i><br><i>(dB)</i> | <i>Thickness</i><br><i>(mm)</i> | <i>Ref.</i> |
|---------------|-------------------------------------------------------------------------------------|-----------------------------------------------|--------------------------|---------------------------------|-------------|
| 1             |    | MWCNT/epoxy                                   | 19                       | 0.35                            | 1           |
| 2             |    | PMMA/CNT                                      | 29                       | 0.57                            | 2           |
| 3             |    | MCMB/MWCNT                                    | 31                       | 0.6                             | 3           |
| 4             |    | Polyimide/graphene                            | 17                       | 0.8                             | 4           |
| 5             |   | Ti <sub>3</sub> C <sub>2</sub> T <sub>x</sub> | 32                       | 1                               | 5           |
| 6             |  | CNT/PS foam                                   | 18.2                     | 1.2                             | 6           |
| 7             |  | CNT/epoxy                                     | 48                       | 1.5                             | 7           |
| 8             |  | C foam                                        | 40.1                     | 2                               | 8           |
| 9             |  | SiC <sub>f</sub> /SiC/PyC                     | 25                       | 2                               | 9           |
| 10            |  | RGO/epoxy                                     | 21                       | 2                               | 10          |
| 11            |  | RGO/PS                                        | 48                       | 2.5                             | 11          |
| 12            |  | PS/Graphene                                   | 29                       | 2.5                             | 12          |
| 13            |  | Fe <sub>3</sub> O <sub>4</sub> /rGO PEI       | 14.3                     | 2.5                             | 13          |

|    |                                                                                   |               |      |       |           |
|----|-----------------------------------------------------------------------------------|---------------|------|-------|-----------|
| 14 |  | CF/PES        | 41.8 | 2.82  | 14        |
| 15 |  | MWCNT/PP      | 28   | 2.8   | 15        |
| 16 |  | rGO/PMMA      | 30   | 3.4   | 16        |
| 17 |  | MXene/CNFs/Ag | 27.5 | 0.045 | This work |
| 18 |  | MXene/CNFs/Ag | 28   | 0.047 | This work |
| 19 |  | MXene/CNFs/Ag | 50.7 | 0.046 | This work |

CNT: carbon nanotube; CNFs: cellulose nanofibers; PES: polyethersulfone; rGO: reduced graphene oxide; MWCNT: multi-walled carbon nanotube; PP: polypropylene; PMMA: poly(methyl methacrylate); CF: carbon fibers; PS: polystyrene.

**Table S2.** The mechanical properties of the MXene/CNFs/silver (MCS) composite membranes.

| <i>Sample</i> | <i>Tensile strength (Mpa)</i> |
|---------------|-------------------------------|
| <b>MXene</b>  | 1.80 ± 0.16                   |
| <b>MCS-1</b>  | 13.90 ± 0.38                  |
| <b>MCS-3</b>  | 32.10 ± 3.80                  |
| <b>MCS-5</b>  | 34.20 ± 7.20                  |



**Table S3.** The content of silver nitrate solution and percentage of residual mass (%) in MXene/CNFs/silver (MCS) composite membranes.

| <i>Sample</i> | <i>Nominal content of silver nitrate solution (mL)</i> | <i>The percentage of residual mass (%) determined by TGA</i> |
|---------------|--------------------------------------------------------|--------------------------------------------------------------|
| MXene-CNFs    | 0                                                      | 73.7%                                                        |
| MCS-1         | 1                                                      | 77.7%                                                        |
| MCS-3         | 3                                                      | 79.2%                                                        |
| MCS-5         | 5                                                      | 83.1%                                                        |

### 3. Supplementary References

- [1] S. Pande, A. Chaudhary, D. Patel, B. P. Singh, R. B. Mathur, *RSC Adv.* 4 (2014) 13839-13849.
- [2] K. Hayashida, Y. Matsuoka, *Carbon* 85 (2015) 363-371.
- [3] A. Chaudhary, S. Kumari, R. Kumar, S. Teotia, B. P. Singh, A. P. Singh, S. K. Dhawan, S. R. Dhakate, *ACS Appl. Mater. Interfaces* 8 (2016) 10600-10608.
- [4] Y. Li, X. Pei, B. Shen, W. Zhai, L. Zhang, W. Zheng, *RSC Adv.* 5 (2015) 24342-24351.
- [5] M. Han, X. Yin, H. Wu, Z. Hou, C. Song, X. Li, L. Zhang, L. Cheng, *ACS Appl. Mater. Interfaces* 8 (2016) 21011-21019.
- [6] Y. Yang, M. C. Gupta, K. L. Dudley, R. W. Lawrence, *Nano Lett.* 5 (2005) 2131-2134.
- [7] N. Li, Y. Huang, F. Du, X. He, X. Lin, H. Gao, Y. Ma, Y. Li, Y. Chen, P. C. Eklund, *Nano Lett.* 6 (2006) 1141-1145.
- [8] F. Moglie, D. Micheli, S. Laurenzi, M. Marchetti, V. M. Primiani, *Carbon* 50 (2012) 1972-1980.
- [9] D. Ding, Y. Shi, Z. Wu, W. Zhou, F. Luo, J. Chen, *Carbon* 60 (2013) 552-555.
- [10] J. Liang, Y. Wang, Y. Huang, Y. Ma, Z. Liu, J. Cai, C. Zhang, H. Gao, Y. Chen, *Carbon* 47 (2009) 922-925.
- [11] D. X. Yan, H. Pang, B. Li, R. Vajtai, L. Xu, P. G. Ren, Z. M. Li, *Adv. Funct. Mater.* 25 (2015) 559-566.
- [12] D. X. Yan, P. G. Ren, H. Pang, Q. Fu, M. B. Yang, Z. M. Li, *J. Mater. Chem.* 22 (2012) 18772-18774.
- [13] B. Shen, W. Zhai, M. Tao, J. Ling, W. Zheng, *ACS Appl. Mater. Interfaces* 5 (2013) 11383-11391.
- [14] L. Li, D. D. L. Chung, *Composites* 25 (1994) 215-224.
- [15] M. H. Al-Saleh, U. Sundararaj, *Carbon* 47 (2009) 1738-1746.
- [16] H. Zhang, W. G. Zheng, Q. Yan, Z. Jiang, Z. Yu, *Carbon* 50 (2012) 5117-5125.
